# Supplementary material
Source: publisher site journal article supplement (https://www.dovepress.com/article/supplementary_file/590462/supplementary%20material_Revised.docx)
Supplement: Supplementary file 1 [file supplementary%20material_Revised.docx]

**The socioeconomic impact of long-acting injectable buprenorphine**

**SUPPLEMENTARY MATERIAL**

Samuel E. Rasche 1,*, George O. W. Batchelor 1, Catharine Montgomery 2, Harry R. Sumnall 2, Daniel Mogford 3

*1 Edge Health, London, UK*

*2 School of Psychology, Liverpool John Moores University, Liverpool, UK*

*3 Camurus Ltd., Cambridge, UK*

** Correspondence: Samuel E. Rasche – samuel.rasche@edgehealth.co.uk*

This document contains supplementary results related to the analysis reported in the main

manuscript.

**Supplementary material 1**

**Table S1. Estimated benefits and costs of LAIB under sensitivity analysis.**

| Benefits | Target populationa | Variables | Value (Lower bound, LB) | Value (Upper bound, UB) |
| --- | --- | --- | --- | --- |
| Employment | 29,794 | - 7% (LB) -11% (UB) employment increase 42-44  - £21,278 annual income | £44,377,359 | £69,735,849 |
| Incarcerations | 21,198 | - 49% of prisoners with OUD treated with LAIB 38  - 17% decrease in re-incarceration 36  - £51,108 cost per prisoner 54  - no range of variation could be identified | £71,248,893 | £71,248,893 |
| Crime | 5,538 | - £8,571 (LB) - £12,227 (UB) reduction in crime cost per person entering treatment 55 | £47,466,061 | £67,712,204 |
| Foster care | 5,538 | - 35% of children of people starting treatment receive social care 3  - 20% of these children are looked after 3  - 67% of children looked after are in foster care 3  - 25% (LB) - 37% (UB) is reunited with parent 59  - £24,500 per child in foster care 60 | £967,243 | £1,431,519 |
| Child protection plans | 5,538 | - 35% of children of people starting treatment receive social care 3  - 40% of these children have child protection plan 3  - £5,321 per child protection plan 61  - This benefit is excluded in the lower bound calculation due to lack of data on reduction in plans. | £0 | £2,508,290 |
| Healthcare | 29,794 | - £539 reduction in healthcare costs when treated with buprenorphine 64  - the lower bound considers only those switching from methadone specifically (N = 16,979) | £9,151,845 | £16,059,102 |
| Prevented fatalities from entering treatment | 5,538 | - reduction in 0.006 (LB) - 0.0397 32 (UB) deaths per person-year when treated | £1,708,869 | £11,307,014 |
| Prevented fatalities from switching treatment | 16,979 | - reduction in 0.0067 deaths per person-year when treated with buprenorphine 32  - no range of variation could be identified | £5,850,478 | £5,850,478 |
| Improved quality of life from entering treatment | 5,538 | - 0.11 QALY per year when treated 33  - no range of variation could be identified | £12,183,600 | £12,183,600 |
| Improved quality of life from switching treatment | 24,256 | - 0.043 QALY per year when switching to LAIB 34  - no range of variation could be identified | £20,859,902 | £20,859,902 |
| Total benefit |  |  | £213,814,250 | £278,896,853 |
| Costs |  |  |  |  |
| Treatment costs for those entering treatment | 5,538 | - £3,101 yearly cost of LAIB 34,71  - no range of variation could be identified | £17,173,560 | £17,173,560 |
| Treatment costs for those switching treatment | 24,256 | - £2,459 additional treatment cost when switching to LAIB 34,70,71  - no range of variation could be identified | £59,645,737 | £59,645,737 |
| Total Cost |  |  | £76,819,296 | £76,819,296 |
| Net impact |  |  | £136,994,954 | £202,077,557 |
| BCR |  |  | 2.78 | 3.63 |

Notes: Values represent the ranges applied in sensitivity testing, reflecting uncertainty in parameters. Where no plausible range was available, fixed point estimates from Table 1 were retained. The values presented here have been rounded for clarity, with exact values used in the underlying model. aTarget population refers to the subgroup of people with OUD receiving LAIB from which the benefit is derived.
